# Supplementary material for: Predictive value of the composition of the vaginal microbiota in bacterial vaginosis, a dynamic study to identify recurrence-related flora
Source: PubMed Central journal article supplement (PMC4890590; doi:10.1038/srep26674), 2016-06-02
Supplement: srep26674-s1.pdf [file srep26674-s1.pdf]

# Predictive value of the composition of the vaginal microbiota in bacterial vaginosis, a dynamic study to identify recurrence-related flora

Bingbing Xiao, Xiaoxi Niu, Na Han, Ben Wang, Pengcheng Du, Risu Na, Chen Chen, and

Qinping Liao

**Supplementary table 1:** The numbers of OTUs in individual samples from 68 patients at three different time points: Day 0 (D0, before treatment), Day 7 (D7, stop using the antibiotics) and Day 30 (D30, the 30-day follow-up visit).

| Patient ID | # of OTUs |         |        | Outcome |
|------------|-----------|---------|--------|---------|
|            | Day 0     | Day 7   | Day 30 |         |
| 118        | 289       | No data | 346    | Failed  |
| 126        | 677       | 264     | 275    | Failed  |
| 144        | 372       | 276     | 349    | Failed  |
| 162        | 392       | 92      | 307    | Failed  |
| 171        | 182       | 148     | 168    | Failed  |
| 173        | 520       | 85      | 571    | Failed  |
| 193        | 366       | 120     | 274    | Failed  |
| 197        | 483       | 54      | 380    | Failed  |
| 237        | 499       | 112     | 498    | Failed  |
| 246        | 195       | 117     | 165    | Failed  |
| 249        | 339       | 249     | 309    | Failed  |
| 296        | 276       | 90      | 137    | Failed  |
| 300        | 617       | 185     | 465    | Failed  |
| 303        | 272       | 58      | 148    | Failed  |
| 307        | 345       | 83      | 364    | Failed  |
| 309        | 272       | No data | 121    | Failed  |
| 324        | 200       | 387     | 114    | Failed  |
| 342        | 469       | 70      | 393    | Failed  |
| 355        | 137       | 132     | 432    | Failed  |
| 30         | 433       | 144     | 100    | Cured   |
| 70         | 483       | 66      | 68     | Cured   |

|     |     |         |     |       |
|-----|-----|---------|-----|-------|
| 111 | 304 | 210     | 87  | Cured |
| 124 | 411 | 76      | 60  | Cured |
| 127 | 289 | 74      | 130 | Cured |
| 130 | 706 | 77      | 111 | Cured |
| 151 | 426 | 91      | 86  | Cured |
| 156 | 247 | 75      | 157 | Cured |
| 166 | 420 | 98      | 88  | Cured |
| 167 | 393 | No data | 54  | Cured |
| 168 | 275 | 105     | 346 | Cured |
| 170 | 273 | 109     | 272 | Cured |
| 175 | 352 | 78      | 84  | Cured |
| 182 | 209 | 134     | 72  | Cured |
| 188 | 419 | 59      | 71  | Cured |
| 191 | 427 | 78      | 93  | Cured |
| 196 | 380 | 74      | 118 | Cured |
| 198 | 581 | 82      | 123 | Cured |
| 205 | 440 | 189     | 84  | Cured |
| 209 | 561 | 71      | 99  | Cured |
| 230 | 631 | 95      | 78  | Cured |
| 232 | 365 | 92      | 231 | Cured |
| 238 | 325 | 118     | 153 | Cured |
| 243 | 208 | 137     | 132 | Cured |
| 244 | 227 | 105     | 91  | Cured |
| 247 | 432 | 132     | 377 | Cured |
| 248 | 104 | 79      | 104 | Cured |
| 250 | 262 | 196     | 73  | Cured |
| 265 | 319 | 72      | 56  | Cured |
| 267 | 437 | 109     | 69  | Cured |
| 270 | 528 | 68      | 158 | Cured |
| 272 | 364 | 207     | 127 | Cured |
| 273 | 304 | 71      | 75  | Cured |
| 275 | 406 | 81      | 66  | Cured |
| 278 | 266 | 104     | 238 | Cured |
| 288 | 400 | 96      | 75  | Cured |
| 292 | 270 | 66      | 182 | Cured |
| 293 | 151 | 162     | 102 | Cured |
| 294 | 324 | 136     | 179 | Cured |
| 301 | 208 | 56      | 130 | Cured |
| 311 | 259 | 129     | 285 | Cured |
| 313 | 309 | 177     | 118 | Cured |
| 318 | 298 | 82      | 202 | Cured |
| 322 | 339 | 79      | 67  | Cured |
| 328 | 603 | 90      | 209 | Cured |
| 332 | 460 | 120     | 131 | Cured |

|     |     |     |     |       |
|-----|-----|-----|-----|-------|
| 339 | 238 | 128 | 221 | Cured |
| 340 | 427 | 73  | 123 | Cured |
| 356 | 321 | 99  | 163 | Cured |

---
